# Supplementary material for: A prospective study of injuries and illnesses among 910 amateur golfers during one season
Source: PubMed Central journal article supplement — BMJ Open Sport Exerc Med. 2024 Jul 31;10(3):e001844. doi: 10.1136/bmjsem-2023-001844 (PMC11293382; doi:10.1136/bmjsem-2023-001844), 2024-07-31
Supplement: bmjsem-10-3-s001.pdf [file bmjsem-10-3-s001.pdf]

## Appendix 1

Number of athletes invited: 912

|             | Males | Females | Total |
|-------------|-------|---------|-------|
| USA         | 655   | 114     | 769   |
| Switzerland | 80    | 63      | 143   |
| Total       | 735   | 177     | 912   |

Number of athletes with at least one response: 910

|             | Males | Females | Total |
|-------------|-------|---------|-------|
| USA         | 653   | 114     | 767   |
| Switzerland | 80    | 63      | 143   |
| Total       | 733   | 177     | 910   |

### Response rate

Overall: 57.6% (11180 responses from 19406 invitations)

USA = 50.7%

Switzerland = 91.9%

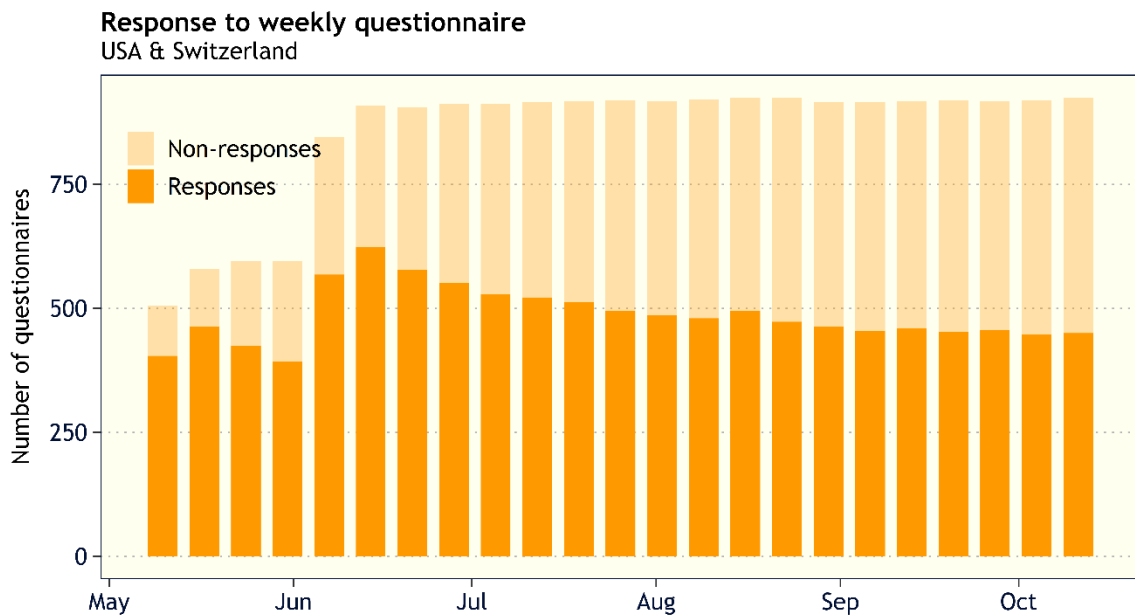



## Prevalence, both cohorts combined

### Prevalence of health problems (%)

|                              | Females           | Males             | Both sexes       |
|------------------------------|-------------------|-------------------|------------------|
| All health problems          | 14.1 [12.1, 16.1] | 12.7 [11.2, 14.3] | 13 [11.4, 14.6]  |
| All injuries                 | 10.7 [9.1, 12.3]  | 11.5 [10, 13]     | 11.3 [9.8, 12.8] |
| All acute injuries           | 4.1 [3, 5.3]      | 5 [4.2, 5.7]      | 4.8 [4, 5.6]     |
| All overuse injuries         | 7 [6.3, 7.8]      | 6.7 [5.9, 7.5]    | 6.8 [6, 7.5]     |
| All illness                  | 4.5 [3.5, 5.4]    | 1.3 [1.1, 1.6]    | 2 [1.7, 2.2]     |
| Substantial health problems  | 5.7 [4.8, 6.6]    | 5.8 [5.2, 6.4]    | 5.8 [5.1, 6.4]   |
| Substantial injuries         | 3.3 [2.7, 4]      | 4.9 [4.3, 5.4]    | 4.6 [4, 5.1]     |
| Substantial acute injuries   | 1.6 [1.1, 2]      | 2.7 [2.2, 3.1]    | 2.4 [2, 2.9]     |
| Substantial overuse injuries | 1.8 [1.3, 2.2]    | 2.3 [2, 2.5]      | 2.2 [1.9, 2.4]   |
| Substantial illness          | 2.6 [2, 3.2]      | 1 [0.8, 1.2]      | 1.3 [1.1, 1.5]   |

## Prevalence, each cohort separately

### Prevalence of health problems, USA (%)

|                              | Females           | Males             | Both sexes        |
|------------------------------|-------------------|-------------------|-------------------|
| All health problems          | 14.2 [12.2, 16.3] | 12.8 [11.3, 14.2] | 13 [11.5, 14.5]   |
| All injuries                 | 11.6 [9.8, 13.3]  | 11.6 [10.2, 13.1] | 11.6 [10.2, 13.1] |
| All acute injuries           | 4.4 [3.1, 5.7]    | 5.2 [4.4, 6]      | 5.1 [4.2, 5.9]    |
| All overuse injuries         | 7.2 [6.2, 8.2]    | 6.7 [5.9, 7.4]    | 6.8 [6, 7.5]      |
| All illness                  | 2.8 [2.3, 3.4]    | 1.2 [1, 1.4]      | 1.4 [1.2, 1.6]    |
| Substantial health problems  | 6.1 [5.1, 7.1]    | 6.1 [5.5, 6.7]    | 6.1 [5.5, 6.7]    |
| Substantial injuries         | 4.2 [3.4, 5]      | 5.2 [4.6, 5.9]    | 5.1 [4.5, 5.7]    |
| Substantial acute injuries   | 1.9 [1.2, 2.6]    | 2.9 [2.4, 3.4]    | 2.7 [2.3, 3.2]    |
| Substantial overuse injuries | 2.3 [1.7, 2.9]    | 2.4 [2.1, 2.7]    | 2.4 [2.2, 2.6]    |
| Substantial illness          | 2 [1.5, 2.6]      | 0.9 [0.8, 1.1]    | 1.1 [0.9, 1.3]    |

**Prevalence of health problems, Switzerland (%)**

|                              | Females           | Males          | Both sexes        |
|------------------------------|-------------------|----------------|-------------------|
| All health problems          | 13.5 [11.3, 15.6] | 12 [10, 13.9]  | 12.6 [10.7, 14.5] |
| All injuries                 | 9.2 [7.6, 10.8]   | 10 [8.3, 11.6] | 9.6 [8.2, 11.1]   |
| All acute injuries           | 3.9 [2.8, 5]      | 3.3 [2.6, 4]   | 3.6 [2.8, 4.3]    |
| All overuse injuries         | 6.4 [5.6, 7.2]    | 6.8 [5.4, 8.1] | 6.6 [5.6, 7.6]    |
| All illness                  | 6.4 [5, 7.8]      | 2.3 [1.5, 3]   | 4.1 [3.2, 5]      |
| Substantial health problems  | 4.7 [3.6, 5.9]    | 3.6 [2.7, 4.6] | 4.1 [3.2, 5]      |
| Substantial injuries         | 1.9 [1.2, 2.6]    | 2.3 [1.6, 3]   | 2.1 [1.6, 2.7]    |
| Substantial acute injuries   | 1.1 [0.6, 1.6]    | 1 [0.5, 1.5]   | 1.1 [0.7, 1.4]    |
| Substantial overuse injuries | 0.7 [0.4, 1.1]    | 1.4 [0.8, 1.9] | 1.1 [0.7, 1.5]    |
| Substantial illness          | 3.1 [2.3, 3.9]    | 1.4 [0.8, 1.9] | 2.1 [1.6, 2.7]    |

## Incidence, severity and burden, both cohorts combined

Incidence expressed as cases per athlete per year. Burden is time loss days per athlete per year.

### Incidence, severity and burden

|                      | Sex        | Cases (n) | Incidence [95% CI] | Median time loss (25th-75th percentile) | Mean time loss [95% CI] | Burden |
|----------------------|------------|-----------|--------------------|-----------------------------------------|-------------------------|--------|
| All health problems  | Both sexes | 996       | 4.73 [4.44, 5.02]  | 2 (0-5)                                 | 5.11 [4.39, 5.9]        | 24.15  |
|                      | Male       | 760       | 4.64 [4.32, 4.98]  | 2 (0-6)                                 | 5.11 [4.37, 5.9]        | 23.73  |
|                      | Female     | 236       | 5.01 [4.4, 5.68]   | 1.5 (0-4)                               | 5.11 [4.38, 5.94]       | 25.62  |
| Sudden-onset injury  | Both sexes | 345       | 1.64 [1.47, 1.81]  | 2 (0-6)                                 | 6.35 [4.76, 8.21]       | 10.40  |
| Gradual-onset injury | Both sexes | 454       | 2.15 [1.96, 2.36]  | 1 (0-3)                                 | 3.66 [2.91, 4.46]       | 7.88   |
| Illness              | Both sexes | 197       | 0.94 [0.81, 1.07]  | 3 (1-7)                                 | 6.3 [4.73, 8.24]        | 5.90   |
| Head                 | Both sexes | 4         | 0.02 [0.01, 0.05]  | 3.5 (0-8.75)                            | 5.25 [0, 10.5]          | 0.11   |
| Neck                 | Both sexes | 39        | 0.19 [0.14, 0.25]  | 0 (0-2.5)                               | 2.15 [1.18, 3.28]       | 0.40   |
| Shoulder             | Both sexes | 69        | 0.33 [0.25, 0.41]  | 1 (0-6)                                 | 10.6 [4.84, 17.3]       | 3.47   |
| Upper arm            | Both sexes | 6         | 0.03 [0.01, 0.06]  | 1.5 (0.25-2)                            | 2 [0.5, 4.17]           | 0.05   |
| Elbow                | Both sexes | 50        | 0.24 [0.18, 0.31]  | 0 (0-2)                                 | 3.98 [1.28, 8.26]       | 0.95   |
| Forearm              | Both sexes | 17        | 0.08 [0.05, 0.12]  | 1 (0-3)                                 | 7 [1, 17.7]             | 0.58   |
| Wrist                | Both sexes | 26        | 0.12 [0.08, 0.18]  | 0 (0-1.75)                              | 2.19 [0.69, 4.35]       | 0.27   |
| Hand                 | Both sexes | 32        | 0.15 [0.1, 0.21]   | 0 (0-3.5)                               | 4.06 [1.47, 7.34]       | 0.61   |
| Thoracic spine       | Both sexes | 47        | 0.22 [0.17, 0.3]   | 1 (0-5)                                 | 3.06 [2, 4.3]           | 0.68   |
| Lumbosacral          | Both sexes | 265       | 1.26 [1.11, 1.41]  | 2 (0-5)                                 | 4.71 [3.77, 5.78]       | 5.93   |
| Abdomen              | Both sexes | 11        | 0.05 [0.03, 0.09]  | 1 (0-2.5)                               | 2.55 [0.64, 5.09]       | 0.13   |

**Incidence, severity and burden**

|                    | Sex        | Cases (n) | Incidence [95% CI] | Median time loss (25th-75th percentile) | Mean time loss [95% CI] | Burden |
|--------------------|------------|-----------|--------------------|-----------------------------------------|-------------------------|--------|
| Hip/groin          | Both sexes | 53        | 0.25 [0.19, 0.33]  | 1 (0-3)                                 | 3.09 [1.47, 5.3]        | 0.77   |
| Thigh              | Both sexes | 17        | 0.08 [0.05, 0.12]  | 2 (0-10)                                | 4.88 [2.53, 7.18]       | 0.41   |
| Knee               | Both sexes | 82        | 0.39 [0.31, 0.48]  | 1 (0-4)                                 | 5.33 [2.72, 9.06]       | 2.08   |
| Lower leg          | Both sexes | 10        | 0.05 [0.03, 0.08]  | 2.5 (0-4)                               | 2.7 [1.1, 4.3]          | 0.13   |
| Ankle              | Both sexes | 16        | 0.08 [0.05, 0.12]  | 3 (0-8.25)                              | 6.44 [2.31, 11.2]       | 0.50   |
| Foot               | Both sexes | 46        | 0.22 [0.16, 0.29]  | 2 (0-4)                                 | 4.46 [2.02, 8.22]       | 0.97   |
| Region unspecified | Both sexes | 9         | 0.04 [0.02, 0.08]  | 3 (1-5)                                 | 6.67 [1.67, 15]         | 0.28   |

## Incidence, severity and burden, each cohort individually

### Incidence, severity and burden, USA

|                      | Sex        | Cases (n) | Incidence [95% CI] | Median time loss (25th-75th percentile) | Mean time loss [95% CI] | Burden |
|----------------------|------------|-----------|--------------------|-----------------------------------------|-------------------------|--------|
| All health problems  | Both sexes | 949       | 5.45 [5.11, 5.8]   | 2 (0-5)                                 | 5.12 [4.33, 5.98]       | 27.90  |
|                      | Male       | 805       | 5.34 [4.98, 5.71]  | 1 (0-6)                                 | 5.12 [4.35, 5.96]       | 27.32  |
|                      | Female     | 144       | 6.19 [5.24, 7.27]  | 2 (0-5)                                 | 5.12 [4.36, 5.97]       | 31.71  |
| Sudden-onset injury  | Both sexes | 348       | 2 [1.8, 2.22]      | 2 (0-7)                                 | 6.28 [4.7, 8.13]        | 12.54  |
| Gradual-onset injury | Both sexes | 451       | 2.59 [2.36, 2.84]  | 1 (0-3)                                 | 3.67 [2.91, 4.58]       | 9.50   |
| Illness              | Both sexes | 150       | 0.86 [0.73, 1.01]  | 4 (2-7)                                 | 6.79 [5, 9.15]          | 5.86   |
| Head                 | Both sexes | 5         | 0.03 [0.01, 0.06]  | 0 (0-0)                                 | 2.8 [0, 8.4]            | 0.09   |
| Neck                 | Both sexes | 39        | 0.22 [0.16, 0.3]   | 0 (0-2.5)                               | 2.15 [1.13, 3.31]       | 0.48   |
| Shoulder             | Both sexes | 73        | 0.42 [0.33, 0.53]  | 1 (0-4)                                 | 10.3 [4.59, 17.5]       | 4.34   |
| Upper arm            | Both sexes | 7         | 0.04 [0.02, 0.08]  | 1 (0-2)                                 | 1.71 [0.29, 3.57]       | 0.07   |
| Elbow                | Both sexes | 62        | 0.35 [0.28, 0.45]  | 0 (0-3)                                 | 3.45 [1.34, 6.89]       | 1.22   |
| Forearm              | Both sexes | 15        | 0.09 [0.05, 0.14]  | 0 (0-3)                                 | 7.4 [0.67, 19.3]        | 0.65   |
| Wrist                | Both sexes | 24        | 0.14 [0.09, 0.2]   | 0.5 (0-3)                               | 2.5 [0.83, 4.75]        | 0.35   |
| Hand                 | Both sexes | 38        | 0.22 [0.16, 0.3]   | 0 (0-4.75)                              | 3.89 [1.66, 6.84]       | 0.85   |
| Thoracic spine       | Both sexes | 48        | 0.28 [0.21, 0.36]  | 1 (0-6)                                 | 3.19 [2.06, 4.38]       | 0.88   |
| Lumbosacral          | Both sexes | 247       | 1.42 [1.25, 1.6]   | 2 (0-6)                                 | 4.91 [3.88, 5.98]       | 6.97   |
| Abdomen              | Both sexes | 15        | 0.09 [0.05, 0.14]  | 1 (0-4)                                 | 2.27 [0.93, 3.73]       | 0.20   |
| Hip/groin            | Both sexes | 48        | 0.28 [0.21, 0.36]  | 1 (0-4)                                 | 3.5 [1.73, 6]           | 0.96   |

### Incidence, severity and burden, USA

|                    | Sex        | Cases (n) | Incidence [95% CI] | Median time loss (25th-75th percentile) | Mean time loss [95% CI] | Burden |
|--------------------|------------|-----------|--------------------|-----------------------------------------|-------------------------|--------|
| Thigh              | Both sexes | 11        | 0.06 [0.03, 0.11]  | 2 (0-7)                                 | 3.64 [1.45, 6]          | 0.23   |
| Knee               | Both sexes | 89        | 0.51 [0.41, 0.62]  | 1 (0-4)                                 | 5.08 [2.57, 8.61]       | 2.59   |
| Lower leg          | Both sexes | 9         | 0.05 [0.03, 0.09]  | 3 (0-7)                                 | 3.33 [1.44, 5.22]       | 0.17   |
| Ankle              | Both sexes | 17        | 0.1 [0.06, 0.15]   | 0 (0-7)                                 | 5.71 [1.94, 10.5]       | 0.56   |
| Foot               | Both sexes | 46        | 0.27 [0.2, 0.35]   | 1.5 (0-4.75)                            | 4.5 [2.07, 8.24]        | 1.19   |
| Region unspecified | Both sexes | 6         | 0.04 [0.02, 0.07]  | 3.5 (1.25-5)                            | 8.5 [1.5, 20.7]         | 0.31   |

### Incidence, severity and burden, Switzerland

|                      | Sex        | Cases (n) | Incidence [95% CI] | Median time loss (25th-75th percentile) | Mean time loss [95% CI] | Burden |
|----------------------|------------|-----------|--------------------|-----------------------------------------|-------------------------|--------|
| All health problems  | Both sexes | 194       | 3.33 [2.89, 3.83]  | 1 (0-3.75)                              | 3.32 [2.36, 4.6]        | 11.07  |
|                      | Male       | 96        | 2.97 [2.42, 3.61]  | 1 (0-4)                                 | 3.32 [2.36, 4.61]       | 9.86   |
|                      | Female     | 98        | 3.79 [3.09, 4.59]  | 1 (0-3)                                 | 3.32 [2.36, 4.58]       | 12.57  |
| Sudden-onset injury  | Both sexes | 51        | 0.87 [0.66, 1.14]  | 2 (0-4.5)                               | 3.24 [2.16, 4.53]       | 2.83   |
| Gradual-onset injury | Both sexes | 77        | 1.32 [1.05, 1.64]  | 0 (0-2)                                 | 2.08 [1.25, 3.05]       | 2.75   |
| Illness              | Both sexes | 66        | 1.13 [0.88, 1.44]  | 2 (0-4)                                 | 4.83 [2.52, 8.33]       | 5.48   |
| Head                 | Both sexes | 1         | 0.02 [0, 0.08]     | 7 (7-7)                                 | NA [NA, NA]             |        |
| Neck                 | Both sexes | 7         | 0.12 [0.05, 0.23]  | 2 (0-2)                                 | 1.29 [0.43, 2.14]       | 0.15   |
| Shoulder             | Both sexes | 13        | 0.22 [0.12, 0.37]  | 1 (0-2)                                 | 2 [0.62, 3.54]          | 0.45   |



### Incidence, severity and burden, Switzerland

|                    | Sex        | Cases (n) | Incidence [95% CI] | Median time loss (25th-75th percentile) | Mean time loss [95% CI] | Burden |
|--------------------|------------|-----------|--------------------|-----------------------------------------|-------------------------|--------|
| Elbow              | Both sexes | 4         | 0.07 [0.02, 0.16]  | 0 (0-4)                                 | 4 [0, 12]               | 0.27   |
| Forearm            | Both sexes | 4         | 0.07 [0.02, 0.16]  | 0.5 (0-2.5)                             | 2 [0, 5.25]             | 0.14   |
| Wrist              | Both sexes | 6         | 0.1 [0.04, 0.21]   | 0 (0-0)                                 | 0.33 [0, 1]             | 0.03   |
| Hand               | Both sexes | 3         | 0.05 [0.02, 0.14]  | 0 (0-0)                                 | 0 [0, 0]                | 0.00   |
| Thoracic spine     | Both sexes | 6         | 0.1 [0.04, 0.21]   | 1 (0-3.5)                               | 2.5 [0.33, 5.5]         | 0.26   |
| Lumbosacral        | Both sexes | 46        | 0.79 [0.59, 1.05]  | 0.5 (0-3)                               | 2.41 [1.33, 3.74]       | 1.90   |
| Abdomen            | Both sexes | 1         | 0.02 [0, 0.08]     | 13 (13-13)                              | NA [NA, NA]             |        |
| Hip/groin          | Both sexes | 9         | 0.16 [0.08, 0.28]  | 0 (0-0)                                 | 0.44 [0, 1.11]          | 0.07   |
| Thigh              | Both sexes | 7         | 0.12 [0.05, 0.23]  | 8 (0.5-11.5)                            | 6.57 [2.29, 10.6]       | 0.79   |
| Knee               | Both sexes | 11        | 0.19 [0.1, 0.33]   | 0 (0-2.5)                               | 3.09 [0.46, 7.18]       | 0.58   |
| Lower leg          | Both sexes | 2         | 0.04 [0.01, 0.11]  | 2 (1-3)                                 | NA [NA, NA]             |        |
| Ankle              | Both sexes | 2         | 0.04 [0.01, 0.11]  | 6.5 (5.75-7.25)                         | NA [NA, NA]             |        |
| Foot               | Both sexes | 3         | 0.05 [0.02, 0.14]  | 3 (1.5-3.5)                             | 2.33 [0, 4]             | 0.12   |
| Region unspecified | Both sexes | 3         | 0.05 [0.02, 0.14]  | 3 (1.5-5)                               | 3.33 [0, 7]             | 0.17   |
